# Supplementary material
Source: ML conference proceedings conference paper supplement (https://proceedings.mlr.press/v71/adelsberg18a.html)
Supplement: Supplementary file [file adelsberg18a-supp.pdf]

## Appendix for “Binned Kernels for Anomaly Detection in Multi-timescale Data using Gaussian Processes”

**Matthew van Adelsberg**

MATTHEW.VANADELBERG@CAPITALONE.COM

**Christian Schwantes**

CHRISTIAN.SCHWANTES@CAPITALONE.COM

1680 Capital One Drive McLean, VA 22102

### Appendix A. Binned Kernel Spectral Identity

We can define a sequence of kernels through the Fourier transform:

$$\hat{k}_n(f, f') = \int_{-\infty}^{\infty} \int_{-\infty}^{\infty} e^{-\pi^2(t+t')^2/4n} k(t, t') e^{-i2\pi ft} e^{-i2\pi f't'} dt dt', \quad (1)$$

where  $k(t, t')$  is an arbitrary stationary kernel of interest. The reason for defining this sequence with the  $e^{-\pi^2(t+t')^2/4n}$  term is in anticipation of a change of variables to  $u \equiv t - t'$ ,  $v \equiv t + t'$ , which results in:

$$\hat{k}_n(f, f') = \frac{1}{2} \int_{-\infty}^{\infty} e^{-\pi^2 v^2/4n} e^{-i2\pi v(f+f')/2} dv \int_{-\infty}^{\infty} k(u) e^{-i2\pi u(f-f')/2} du. \quad (2)$$

Without the squared-exponential term, the Fourier transform in the first integral only exists as a distribution, rather than a function. We can explicitly evaluate the Fourier transform of the Gaussian function in the first integral:

$$\hat{k}_n(f, f') = \sqrt{\frac{n}{\pi}} e^{-n(f+f')^2} \int_{-\infty}^{\infty} k(u) e^{-i2\pi u(f-f')/2} du. \quad (3)$$

Now consider the binned kernel:

$$\begin{aligned} \bar{k}(t_\Delta, t'_{\Delta'}) &= \frac{1}{\Delta\Delta'} \int_{t-\Delta/2}^{t+\Delta/2} \int_{t'-\Delta'/2}^{t'+\Delta'/2} k(\xi, \xi') d\xi d\xi' = \\ &= \frac{1}{\Delta\Delta'} \int_{-\Delta/2}^{\Delta/2} \int_{-\Delta'/2}^{\Delta'/2} k(\xi + t, \xi' + t') d\xi d\xi' = \\ &= \frac{1}{\Delta\Delta'} \int_{-\infty}^{\infty} \int_{-\infty}^{\infty} \text{rect}(\xi, \xi' | \Delta, \Delta') k(\xi + t, \xi' + t') d\xi d\xi', \quad (4) \end{aligned}$$

where ‘rect’ denotes the two-dimensional rectangle function. Thus,  $\bar{k}(t_\Delta, t'_{\Delta'}) = (\text{rect} \star k)(t, t' | \Delta, \Delta')$ , where  $\star$  is the cross-correlation operator. Using the cross-correlation theorem for Fourier transforms (e.g., [Butz, 2015](#)):

$$\hat{k}(f, f') = \text{r\acute{e}ct}(f, f'|\Delta, \Delta')\hat{k}(f, f') = \text{sinc}(\Delta f)\text{sinc}(\Delta' f')\hat{k}(f, f'). \quad (5)$$

If we substitute Equation (3) into (5) and take the inverse Fourier transform, we obtain:

$$\bar{k}_n(t_\Delta, t'_{\Delta'}) = \int_{-\infty}^{\infty} \int_{-\infty}^{\infty} \sqrt{\frac{n}{\pi}} e^{-n(f+f')^2} \text{sinc}(\Delta f)\text{sinc}(\Delta' f') \times \left[ \int_{-\infty}^{\infty} k(u) e^{-i2\pi u(f-f')/2} du \right] e^{i2\pi f t} e^{i2\pi f' t'} df' df. \quad (6)$$

We note that in Equation (1), taking the limit  $n \rightarrow \infty$  recovers the expression for the Fourier transform of the original kernel of interest. We can therefore compute the inverse Fourier transform for the binned kernel as:

$$\begin{aligned} \bar{k}(t_\Delta, t'_{\Delta'}) &\equiv \lim_{n \rightarrow \infty} \bar{k}_n(t_\Delta, t'_{\Delta'}) = \int_{-\infty}^{\infty} \lim_{n \rightarrow \infty} \int_{-\infty}^{\infty} \sqrt{\frac{n}{\pi}} e^{-n(f+f')^2} \text{sinc}(\Delta f)\text{sinc}(\Delta' f') \times \\ &\quad \left[ \int_{-\infty}^{\infty} k(u) e^{-i2\pi u(f-f')/2} du \right] e^{i2\pi f t} e^{i2\pi f' t'} df' df = \\ &\quad \int_{-\infty}^{\infty} \text{sinc}(\Delta f)\text{sinc}(\Delta' f) \left[ \int_{-\infty}^{\infty} k(u) e^{-i2\pi u f} du \right] e^{i2\pi f(t-t')} df, \quad (7) \end{aligned}$$

where we have used the fact that the result of the inner integral over  $f'$  satisfies the Lebesgue dominated convergence theorem and the functions  $\sqrt{n/\pi} \exp(-n[f + f']^2)$  form a Delta sequence (e.g., [Arfken and Weber, 2005](#)).

Thus, the Fourier transform of the binned kernel becomes:

$$\hat{k}(f) = \text{sinc}(\Delta f)\text{sinc}(\Delta' f)\hat{k}(f). \quad (8)$$

## Appendix B. Fourier Transform of the Locally Periodic Kernel

The locally periodic kernel is defined as:

$$k(u) = \eta^2 e^{-\sin^2(\pi\nu u)/w^2} e^{-u^2/2\ell^2}, \quad (9)$$

where  $u \equiv t - t'$  and  $\eta$ ,  $\nu$ ,  $w$ , and  $\ell$  are hyperparameters. We begin by Taylor expanding the first exponential term:

$$k(u) = \eta^2 \left[ \sum_{n=0}^{\infty} \frac{1}{n!} (-\sin^2(\pi\nu u)/w^2)^n \right] e^{-u^2/2\ell^2}. \quad (10)$$

Expanding the  $\sin^{2n}(\pi\nu u)$  terms and doing some algebra results in:

$$k(u) = \sum_{n=0}^{\infty} \frac{1}{n!} (-1)^n \left(\frac{1}{w^2}\right)^n \frac{1}{2^{2n}} \left[ \binom{2n}{n} + \sum_{k=0}^{n-1} (-1)^{n-k} \binom{2n}{k} \cos(2(n-k)\pi\nu u) \right] \times e^{-u^2/2\ell^2}. \quad (11)$$

If we reindex with  $m = n - k$ , some algebra yields:

$$k(u) = \left[ \sum_{n=0}^{\infty} \frac{1}{n!2^{2n}} \binom{2n}{n} \left(-\frac{1}{w^2}\right)^n + \sum_{n=0}^{\infty} \frac{2}{n!2^{2n}} \left(-\frac{1}{w^2}\right)^n \sum_{m=1}^n (-1)^m \binom{2n}{n-m} \cos(2m\pi\nu u) \right] e^{-u^2/2\ell^2} \quad (12)$$

For a given  $m$ , we can evaluate the sum over  $n$  in terms of a modified Bessel function of the first kind (e.g., [Abramowitz and Stegun, 1972](#)):

$$\sum_{n=m}^{\infty} \frac{1}{n!2^{2n}} \binom{2n}{n-m} \left(-\frac{1}{w^2}\right)^n = e^{-1/2w^2} I_m(-1/2w^2). \quad (13)$$

Thus, the locally periodic kernel can be written:

$$k(u) = \left[ a_0/2 + \sum_{n=1}^{\infty} a_n \cos(2\pi n\nu u) \right] e^{-u^2/2\ell^2}, \quad (14)$$

where  $a_n \equiv 2e^{-1/2w^2} I_n(1/2w^2)$ .

## References

- M. Abramowitz and I. Stegun. *Handbook of Mathematical Functions*. Dover Publications, Inc., 1972.
- G. Arfken and H. Weber. *Mathematical Methods for Physicists*. Elsevier Academic Press Publications, 2005.
- T. Butz. *Fourier Transformation for Pedestrians*. Springer, 2015.
